# Supplementary material for: Amphibian life history in a temperate environment of the Mexican Plateau: dimorphism, phenology and trophic ecology of a hylid frog, Hyla eximia (=Dryophytes eximius)
Source: PeerJ. 2018 Nov 8;6:e5897. doi: 10.7717/peerj.5897 (PMC6234908; doi:10.7717/peerj.5897)
Supplement: Supplemental Information 1 [file peerj-06-5897-s001.xls]

## Sheet: Hoja1
	Especie	Sexo	Age	Sampling 1	Sampling2	Sampling3	Sampling4	Sampling5	Sampling6	Sampling7																recaptures
Hy08	eximia	Male	adult	1	0	0	0	0	0	0		/*	1	eximia	Male	adult	*/	1	0	0	0	0	0	0	/*1eximiaMaleadult*/	1000000	1	0	1	0	0	0	0	0	;
Hy17	eximia	Male	adult	0	1	1	0	1	0	0		/*	2	eximia	Male	adult	*/	0	1	1	0	1	0	0	/*2eximiaMaleadult*/	0110100	1	0	1	0	0	0	0	0	;
Hy23	eximia	Male	adult	0	0	1	0	0	0	0		/*	3	eximia	Male	adult	*/	0	0	1	0	0	0	0	/*3eximiaMaleadult*/	0010000	1	0	1	0	0	0	0	0	;
Hy25	eximia	Male	adult	0	0	1	0	0	0	0		/*	4	eximia	Male	adult	*/	0	0	1	0	0	0	0	/*4eximiaMaleadult*/	0010000	1	0	1	0	0	0	0	0	;
Hy26	eximia	Male	adult	0	0	1	0	0	0	0		/*	5	eximia	Male	adult	*/	0	0	1	0	0	0	0	/*5eximiaMaleadult*/	0010000	1	0	1	0	0	0	0	0	;
Hy36	eximia	Male	adult	0	0	1	1	0	0	0		/*	6	eximia	Male	adult	*/	0	0	1	1	0	0	0	/*6eximiaMaleadult*/	0011000	1	0	1	0	0	0	0	0	;
Hy39	eximia	Male	adult	0	0	1	0	0	0	0		/*	7	eximia	Male	adult	*/	0	0	1	0	0	0	0	/*7eximiaMaleadult*/	0010000	1	0	1	0	0	0	0	0	;
Hy44	eximia	Male	adult	0	0	1	0	1	0	0		/*	8	eximia	Male	adult	*/	0	0	1	0	1	0	0	/*8eximiaMaleadult*/	0010100	1	0	1	0	0	0	0	0	;
Hy48	eximia	Male	adult	0	0	1	1	0	0	0		/*	9	eximia	Male	adult	*/	0	0	1	1	0	0	0	/*9eximiaMaleadult*/	0011000	1	0	1	0	0	0	0	0	;
Hy53	eximia	Male	adult	0	0	1	0	0	0	0		/*	10	eximia	Male	adult	*/	0	0	1	0	0	0	0	/*10eximiaMaleadult*/	0010000	1	0	1	0	0	0	0	0	;
Hy55	eximia	Male	adult	0	0	1	0	0	0	0		/*	11	eximia	Male	adult	*/	0	0	1	0	0	0	0	/*11eximiaMaleadult*/	0010000	1	0	1	0	0	0	0	0	;
Hy57	eximia	Male	adult	0	0	1	0	0	0	0		/*	12	eximia	Male	adult	*/	0	0	1	0	0	0	0	/*12eximiaMaleadult*/	0010000	1	0	1	0	0	0	0	0	;
Hy59	eximia	Male	adult	0	0	1	1	0	0	0		/*	13	eximia	Male	adult	*/	0	0	1	1	0	0	0	/*13eximiaMaleadult*/	0011000	1	0	1	0	0	0	0	0	;
Hy64	eximia	Male	adult	0	0	1	0	0	0	0		/*	14	eximia	Male	adult	*/	0	0	1	0	0	0	0	/*14eximiaMaleadult*/	0010000	1	0	1	0	0	0	0	0	;
Hy80	eximia	Male	adult	0	0	0	1	1	0	0		/*	15	eximia	Male	adult	*/	0	0	0	1	1	0	0	/*15eximiaMaleadult*/	0001100	1	0	1	0	0	0	0	0	;
Hy82	eximia	Female	adult	0	0	0	1	0	0	0		/*	16	eximia	Male	adult	*/	0	0	0	1	0	0	0	/*16eximiaMaleadult*/	0001000	1	0	1	0	0	0	0	0	;
Hy83	eximia	Male	adult	0	0	0	1	0	0	0		/*	17	eximia	Male	adult	*/	0	0	0	1	0	0	0	/*17eximiaMaleadult*/	0001000	1	0	1	0	0	0	0	0	;
Hy84	eximia	Male	adult	0	0	0	1	0	0	0		/*	18	eximia	Male	adult	*/	0	0	0	1	0	0	0	/*18eximiaMaleadult*/	0001000	1	0	1	0	0	0	0	0	;
Hy86	eximia	Male	adult	0	0	0	1	0	0	0		/*	19	eximia	Male	adult	*/	0	0	0	1	0	0	0	/*19eximiaMaleadult*/	0001000	1	0	1	0	0	0	0	0	;
Hy87	eximia	Male	adult	0	0	0	1	0	0	0		/*	20	eximia	Male	adult	*/	0	0	0	1	0	0	0	/*20eximiaMaleadult*/	0001000	1	0	1	0	0	0	0	0	;
Hy89	eximia	Male	adult	0	0	0	1	0	0	0		/*	21	eximia	Male	adult	*/	0	0	0	1	0	0	0	/*21eximiaMaleadult*/	0001000	1	0	1	0	0	0	0	0	;
Hy92	eximia	Male	adult	0	0	0	1	0	0	0		/*	22	eximia	Male	adult	*/	0	0	0	1	1	0	0	/*22eximiaMaleadult*/	0001100	1	0	1	0	0	0	0	0	;
Hy96	eximia	Male	adult	0	0	0	1	1	0	0		/*	23	eximia	Male	adult	*/	0	0	0	1	0	0	1	/*23eximiaMaleadult*/	0001001	1	0	1	0	0	0	0	0	;
Hy97	eximia	Male	adult	0	0	0	1	0	0	1		/*	24	eximia	Male	adult	*/	0	0	0	1	0	0	0	/*24eximiaMaleadult*/	0001000	1	0	1	0	0	0	0	0	;
Hy98	eximia	Male	adult	0	0	0	1	0	0	0		/*	25	eximia	Male	adult	*/	0	0	0	1	0	0	0	/*25eximiaMaleadult*/	0001000	1	0	1	0	0	0	0	0	;
Hy99	eximia	Male	adult	0	0	0	1	0	0	0		/*	26	eximia	Male	adult	*/	0	0	0	0	0	0	1	/*26eximiaMaleadult*/	0000001	1	0	1	0	0	0	0	0	;
Hy107	eximia	Male	juvenile	0	0	0	0	0	1	0		/*	27	eximia	Male	adult	*/	0	0	0	0	0	0	1	/*27eximiaMaleadult*/	0000001	1	0	1	0	0	0	0	0	;
Hy119	eximia	Male	juvenile	0	0	0	0	0	1	0		/*	28	eximia	Male	adult	*/	0	0	0	0	0	0	1	/*28eximiaMaleadult*/	0000001	1	0	1	0	0	0	0	0	;
Hy124	eximia	Male	juvenile	0	0	0	0	0	1	0
Hy125	eximia	Male	juvenile	0	0	0	0	0	1	0		/*	1	eximia	Female	adult	*/	0	0	0	1	0	0	0	/*1eximiaFemaleadult*/	0001000	1	1	1	0	1	0	0	0	;
Hy128	eximia	Male	juvenile	0	0	0	0	0	1	0		/*	2	eximia	Female	adult	*/	1	0	0	0	0	0	0	/*2eximiaFemaleadult*/	1000000	1	1	1	0	1	0	0	0	;
Hy129	eximia	Male	juvenile	0	0	0	0	0	1	0		/*	3	eximia	Female	adult	*/	0	1	1	0	1	0	0	/*3eximiaFemaleadult*/	0110100	1	1	1	0	1	0	0	0	;
Hy145	eximia	Male	juvenile	0	0	0	0	0	1	0		/*	4	eximia	Female	adult	*/	0	0	1	0	0	0	0	/*4eximiaFemaleadult*/	0010000	1	1	1	0	1	0	0	0	;
Hy153	eximia	Male	juvenile	0	0	0	0	0	1	0		/*	5	eximia	Female	adult	*/	0	0	1	0	0	0	0	/*5eximiaFemaleadult*/	0010000	1	1	1	0	1	0	0	0	;
Hy154	eximia	Male	juvenile	0	0	0	0	0	1	0		/*	6	eximia	Female	adult	*/	0	0	1	0	0	0	0	/*6eximiaFemaleadult*/	0010000	1	1	1	0	1	0	0	0	;
Hy160	eximia	Male	juvenile	0	0	0	0	0	1	0		/*	7	eximia	Female	adult	*/	0	0	1	1	0	0	0	/*7eximiaFemaleadult*/	0011000	1	1	1	0	1	0	0	0	;
Hy167	eximia	Male	adult	0	0	0	0	0	0	1		/*	8	eximia	Female	adult	*/	0	0	1	0	0	0	0	/*8eximiaFemaleadult*/	0010000	1	1	1	0	1	0	0	0	;
Hy169	eximia	Male	adult	0	0	0	0	0	0	1		/*	9	eximia	Female	adult	*/	0	0	1	0	1	0	0	/*9eximiaFemaleadult*/	0010100	1	1	1	0	1	0	0	0	;
Hy182	eximia	Male	adult	0	0	0	0	0	0	1		/*	10	eximia	Female	adult	*/	0	0	1	1	0	0	0	/*10eximiaFemaleadult*/	0011000	1	1	1	0	1	0	0	0	;
Hy08	eximia	Female	adult	1	0	0	0	0	0	0
Hy17	eximia	Female	adult	0	1	1	0	1	0	0		/*	1	eximia	Male	juvenile	*/	0	0	0	0	0	1	0	/*1eximiaMalejuvenile*/	0000010	1	0	0	0	0	0	0	0	;
Hy23	eximia	Female	adult	0	0	1	0	0	0	0		/*	2	eximia	Male	juvenile	*/	0	0	0	0	0	1	0	/*2eximiaMalejuvenile*/	0000010	1	0	0	0	0	0	0	0	;
Hy25	eximia	Female	adult	0	0	1	0	0	0	0		/*	3	eximia	Male	juvenile	*/	0	0	0	0	0	1	0	/*3eximiaMalejuvenile*/	0000010	1	0	0	0	0	0	0	0	;
Hy26	eximia	Female	adult	0	0	1	0	0	0	0		/*	5	eximia	Male	juvenile	*/	0	0	0	0	0	1	0	/*5eximiaMalejuvenile*/	0000010	1	0	0	0	0	0	0	0	;
Hy36	eximia	Female	adult	0	0	1	1	0	0	0		/*	6	eximia	Male	juvenile	*/	0	0	0	0	0	1	0	/*6eximiaMalejuvenile*/	0000010	1	0	0	0	0	0	0	0	;
Hy39	eximia	Female	adult	0	0	1	0	0	0	0		/*	7	eximia	Male	juvenile	*/	0	0	0	0	0	1	0	/*7eximiaMalejuvenile*/	0000010	1	0	0	0	0	0	0	0	;
Hy44	eximia	Female	adult	0	0	1	0	1	0	0		/*	8	eximia	Male	juvenile	*/	0	0	0	0	0	1	0	/*8eximiaMalejuvenile*/	0000010	1	0	0	0	0	0	0	0	;
Hy48	eximia	Female	adult	0	0	1	1	0	0	0		/*	9	eximia	Male	juvenile	*/	0	0	0	0	0	1	0	/*9eximiaMalejuvenile*/	0000010	1	0	0	0	0	0	0	0	;
Hy125	eximia	Female	juvenile	0	0	0	0	0	1	0		/*	10	eximia	Male	juvenile	*/	0	0	0	0	0	1	0	/*10eximiaMalejuvenile*/	0000010	1	0	0	0	0	0	0	0	;
Hy128	eximia	Female	juvenile	0	0	0	0	0	1	0		/*	11	eximia	Male	juvenile	*/	0	0	0	0	0	1	0	/*11eximiaMalejuvenile*/	0000010	1	0	0	0	0	0	0	0	;
Hy129	eximia	Female	juvenile	0	0	0	0	0	1	0
Hy145	eximia	Female	juvenile	0	0	0	0	0	1	0		/*	1	eximia	Female	juvenile	*/	0	0	0	0	0	1	0	/*1eximiaFemalejuvenile*/	0000010	1	1	0	0	0	0	0	0	;
Hy153	eximia	Female	juvenile	0	0	0	0	0	1	0		/*	2	eximia	Female	juvenile	*/	0	0	0	0	0	1	0	/*2eximiaFemalejuvenile*/	0000010	1	1	0	0	0	0	0	0	;
Hy154	eximia	Female	juvenile	0	0	0	0	0	1	0		/*	3	eximia	Female	juvenile	*/	0	0	0	0	0	1	0	/*3eximiaFemalejuvenile*/	0000010	1	1	0	0	0	0	0	0	;
Hy160	eximia	Female	juvenile	0	0	0	0	0	1	0		/*	4	eximia	Female	juvenile	*/	0	0	0	0	0	1	0	/*4eximiaFemalejuvenile*/	0000010	1	1	0	0	0	0	0	0	;
												/*	5	eximia	Female	juvenile	*/	0	0	0	0	0	1	0	/*5eximiaFemalejuvenile*/	0000010	1	1	0	0	0	0	0	0	;
												/*	6	eximia	Female	juvenile	*/	0	0	0	0	0	1	0	/*6eximiaFemalejuvenile*/	0000010	1	1	0	0	0	0	0	0	;
												/*	7	eximia	Female	juvenile	*/	0	0	0	0	0	1	0	/*7eximiaFemalejuvenile*/	0000010	1	1	0	0	0	0	0	0	;
